# Supplementary material for: Uncoupling neurotrophic function from nociception of nerve growth factor: what can be learned from a rare human disease?
Source: PubMed Central journal article supplement — Neural Regen Res. 2019 Apr;14(4):570–3. doi: 10.4103/1673-5374.247442 (PMC6352596; doi:10.4103/1673-5374.247442), 2019-04
Supplement: NRR-14-570_Suppl1.pdf [file NRR-14-570_Suppl1.pdf]

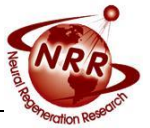

## OPEN PEER REVIEW REPORT 1

**Name of journal:** Neural Regeneration Research

**Manuscript NO:** NRR-D-18-00639

**Title: Uncoupling** Uncoupling neurotrophic function from nociception of nerve growth factor: what can be learned from a rare human disease?

**Reviewer's Name:** Armin Blesch

**Reviewer's country:** USA

**Date sent for review:** 2018-09-12

**Date reviewed:** 2018-10-25

**Review time:** 43 days

### COMMENTS TO AUTHORS

This review describes recent findings about the functional role of NGF-p75 and NGF-trkA signaling in mediating pain responses and the role of specific mutations in NGF. Overall this review conveys the message, but the grammar and style could be improved.
